# Supplementary material for: Poly(lactic- co -glycolic acid) for reagent storage and controlled release in thermoplastic microfluidics
Source: Royal Society of Chemistry journal article supplement (doi:10.1039/d5lc00632e), 2026-01-01
Supplement: d5lc00632e2.pdf [file d5lc00632e2.pdf]

## Supplementary Information

### Poly(lactic-*co*-glycolic acid) for Reagent Storage and Controlled Release in Thermoplastic Microfluidics

Jaesung Lee,<sup>a,b</sup> Evan H. Benke,<sup>b,c</sup> Ian M. White,<sup>b,c</sup> and Don L. DeVoe<sup>\*a,b,c</sup>

<sup>a</sup>Department of Mechanical Engineering, University of Maryland, College Park MD

<sup>b</sup>Fischell Institute for Biomedical Devices, University of Maryland, College Park MD

<sup>c</sup>Fischell Department of Bioengineering, University of Maryland, College Park MD

**Table S1:** LAMP primer target sequences (nuc and mecA primer sequences from Zhao 2022, and femB primer sequences from Chen 2017 and Nanayakkara 2019).

| Primer      | Sequence (5' → 3')                                |
|-------------|---------------------------------------------------|
| nuc F3      | CGATTGATGGTGATACGGTTA                             |
| nuc B3      | CACGTCCATATTTATCAGTTCT                            |
| nuc FIP     | TCTCTACACCTTTTTTAGGATGCTTGTCAAACAATGACATTCAGACT   |
| nuc BIP     | TATGGTCCTGAAGCAAGTGCACCTTTGTCAAACCTCGACTTC        |
| nuc Loop B  | TACGAAAAAATGGTAGAAAAATGCA                         |
| mecA F3     | TGATGCTAAAGTTCAAAAGAG                             |
| mecA B3     | GTAATCTGGAAGTTGTTGAG                              |
| mecA FIP    | TGAAGGTGTGCTTACAAGTGCTAATCAACATGAAAAATGATTATGGCTC |
| mecA BIP    | TGACGTCTATCCATTTATGTATGGCAGGTTCTTTTTTATCTTCGGTTA  |
| mecA Loop F | TCACCTGTTTGAGGGTGG                                |
| femB F3     | TGTTTAAATCACATGGTTACGAG                           |
| femB B3     | TCACGTTCAAGGAATCTGA                               |
| femB FIP    | TACCTTCAAGGTTTAATACGCCCATCATCATGGCTTTACAACTGAG    |
| femB BIP    | ACACCCGAAACATTGAAAAAGACACTTTAACACCATAGTTTATCGCTT  |
| femB Loop F | TCGTACTTGGCTCGATGTATCATA                          |

**Table S2:** Lamp reaction buffer composition (20 µL/reaction).

| Reagent                                                                                                                                                                                                | Concentration |
|--------------------------------------------------------------------------------------------------------------------------------------------------------------------------------------------------------|---------------|
| Trehalose                                                                                                                                                                                              | 10% wt        |
| Isothermal amplification buffer<br>( <a href="https://www.neb.com/en-us/products/b0537-isothermal-amplification-buffer">https://www.neb.com/en-us/products/b0537-isothermal-amplification-buffer</a> ) | 1x            |
| dNTPs<br>( <a href="https://www.neb.com/en-us/products/n0447-deoxynucleotide-dntp-solution-mix">https://www.neb.com/en-us/products/n0447-deoxynucleotide-dntp-solution-mix</a> )                       | 0.6 mM        |
| EvaGreen dye<br>( <a href="https://biotium.com/product/evagreen-dye-20x-in-water/">https://biotium.com/product/evagreen-dye-20x-in-water/</a> )                                                        | 1x            |
| F3 primer (IDT)                                                                                                                                                                                        | 0.2 µM        |
| B3 primer (IDT)                                                                                                                                                                                        | 0.2 µM        |
| FIP primer (IDT)                                                                                                                                                                                       | 1.6 µM        |

|                                                                        |             |
|------------------------------------------------------------------------|-------------|
| BIP primer (IDT)                                                       | 1.6 $\mu$ M |
| Loop primer (IDT)                                                      | 0.8 $\mu$ M |
| BST 2.0 WarmStart DNA polymerase (glycerol free) (New England Biolabs) | 6.4 U       |

**Table S3:** Composition of on-chip primer deposits for LAMP assays (1.7  $\mu$ L/reaction, 2.6x concentrated).

| Reagent           | Concentration |
|-------------------|---------------|
| Trehalose         | 26% wt        |
| F3 primer (IDT)   | 0.52 $\mu$ M  |
| B3 primer (IDT)   | 0.52 $\mu$ M  |
| FIP primer (IDT)  | 4.16 $\mu$ M  |
| BIP primer (IDT)  | 4.16 $\mu$ M  |
| Loop primer (IDT) | 2.08 $\mu$ M  |

**Table S4:** On-chip LAMP solution (300  $\mu$ L/chip)

| Reagent                                                                | Concentration |
|------------------------------------------------------------------------|---------------|
| BST 2.0 WarmStart DNA polymerase (glycerol free) (New England Biolabs) | 96 U          |
| Isothermal amplification buffer                                        | 1x            |
| dNTPs                                                                  | 0.6 mM        |
| EvaGreen dye                                                           | 1x            |

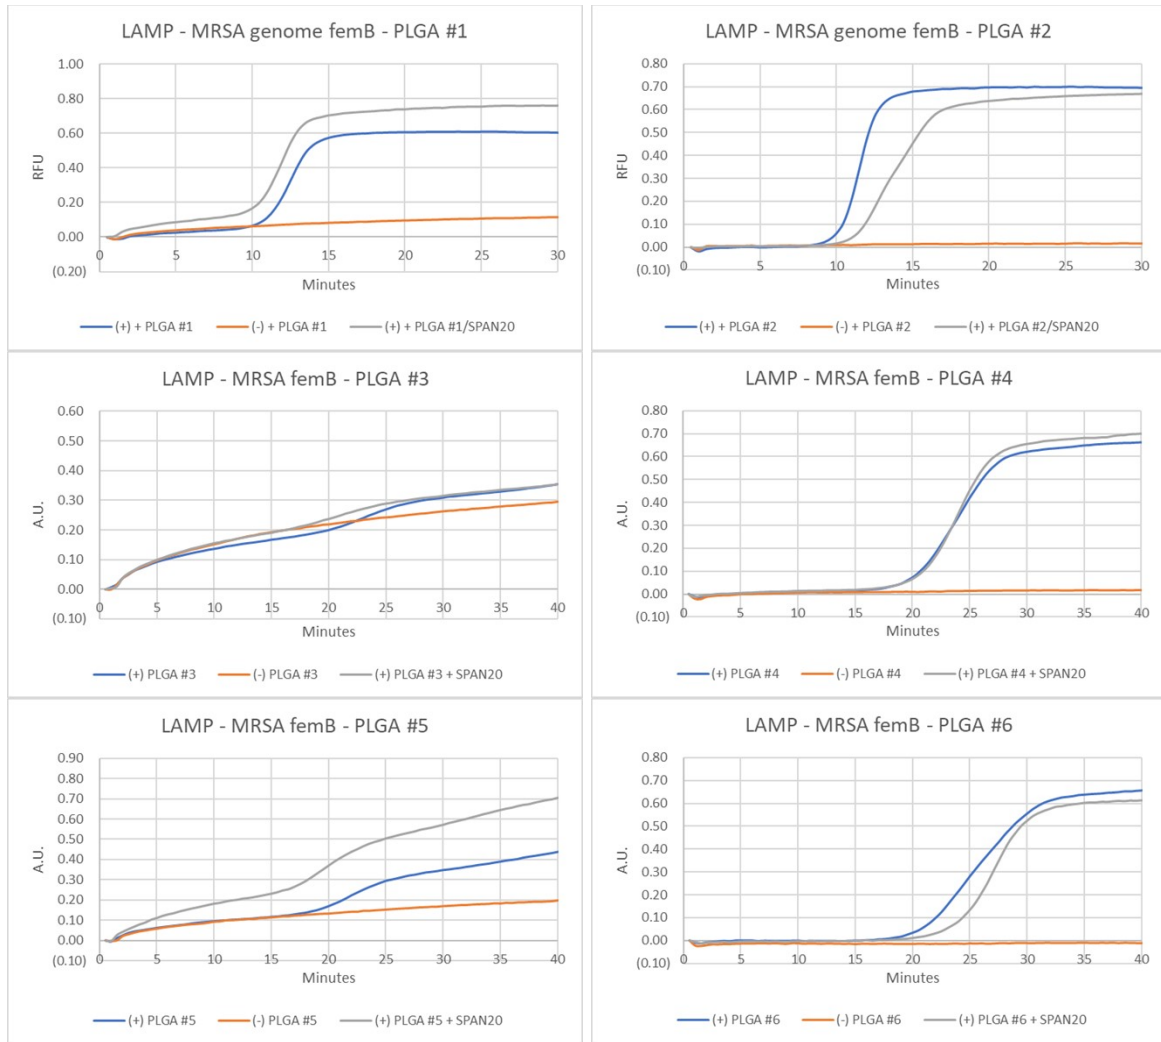

**Figure S1:** Six different PLGA compositions were evaluated for potential LAMP inhibition. Primers were deposited at the base of an Eppendorf tube and encapsulated by a PLGA layer via PLGA/acetone solution dispensing and drying. LAMP master mix and MRSA genomic DNA were added to the tube and incubated at 60 °C in a benchtop thermal cycler (Roche LC480). PLGA compositions #1, #2, #4, and #6 terminated with an ester (-COOR), while #3 and #5 terminated with carboxylic acid (-COOH). No inhibition was observed for the ester-terminated PLGAs, while the carboxyl-terminated PLGAs resulted in significant inhibition. Based on these results, an ester-terminated PLGA (90:10, MW $\leq$ 10k) was used for all further encapsulation and LAMP experiments.

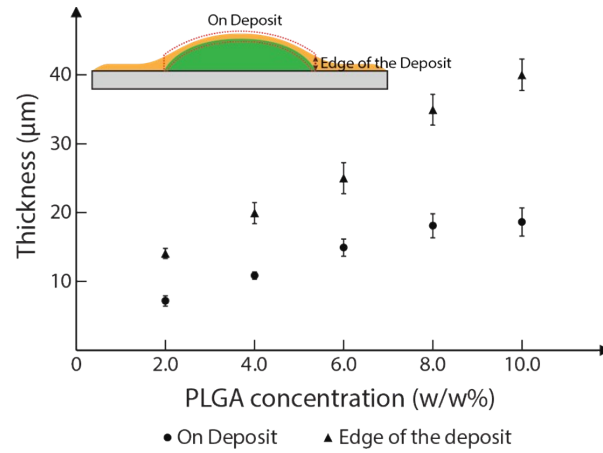

**Figure S2:** Experimental relationship between PLGA concentration in the initial ethyl acetate solution and final PLGA layer thickness measured at the center and edge of the dried reagent deposit.

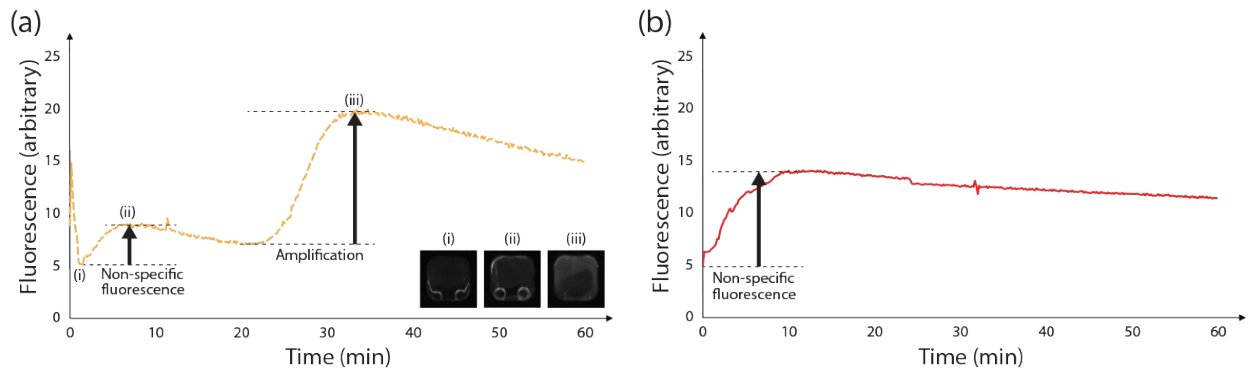

**Figure S3:** (a) On-chip LAMP amplification curve from single well containing PLGA-encapsulated *mecA* primers. A characteristic two-step response is observed, with an early non-specific fluorescence response followed by an increase due to primer-mediated amplification. The steep decrease of fluorescence near  $t = 0$  is due to the inherent temperature dependence of EvaGreen fluorescence. Fluorescence images of a *mecA* well of three different time points: (i) the beginning of the incubation, (ii) after non-specific fluorescence was generated, and (iii) after amplification occurred were included. (b) Amplification curve for a negative control, with only a non-specific fluorescence increase observed.

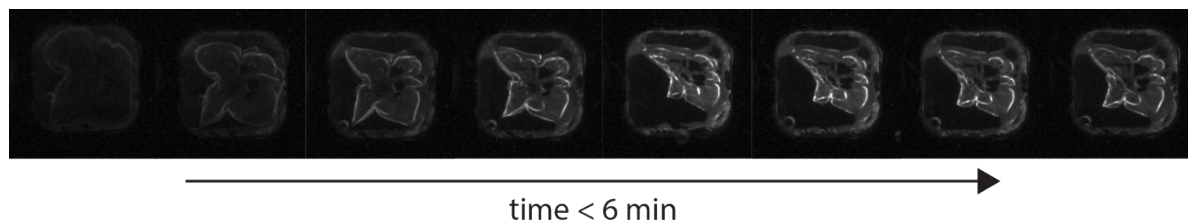

**Figure S4:** Time-lapse images of a shrinking PLGA layer in a well upon heating at 61 °C. The fluorescence of the PLGA film in the well increases non-specifically upon the start of thermal incubation. The brightness of the photos were enhanced for visibility.

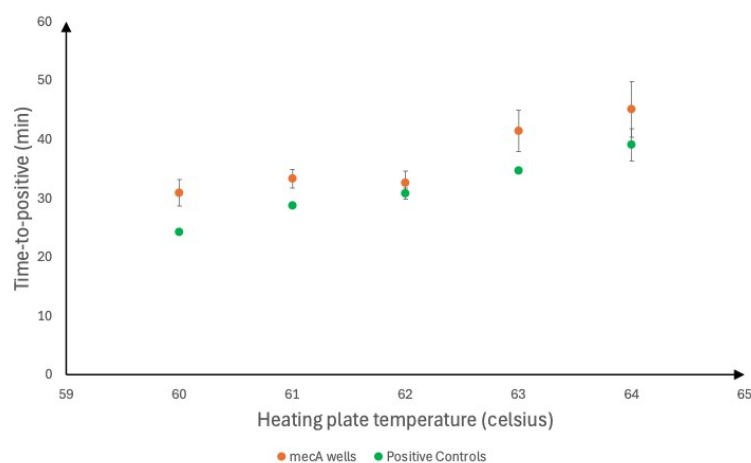

**Figure S5:** Time-to-positive (TTP) of primer-integrated on-chip LAMP assays for *mecA* and positive controls at various heating plate temperatures.

**Note S1:** Non-specific fluorescence was observed from the PLGA layer during on-chip LAMP (Figure S2) that was absent in the release rate experiments. To identify the source of this non-specific signal, a set of on-chip reactions were performed at 61 °C using various combinations of LAMP components deposited in the wells and encapsulated with PLGA (✓ = reagent included, X = reagent excluded):

| Test # | PLGA | Primers | Polymerase | dNTP | LAMP buffer | EvaGreen | Fluorescence intensity |
|--------|------|---------|------------|------|-------------|----------|------------------------|
| 1      | ✓    | ✓       | ✓          | ✓    | ✓           | ✓        | High                   |
| 2      | ✓    | ✓       | ✓          | ✓    | ✓           | X        | Low                    |
| 3      | ✓    | ✓       | ✓          | ✓    | X           | ✓        | High                   |
| 4      | ✓    | ✓       | ✓          | X    | X           | ✓        | High                   |
| 5      | ✓    | X       | ✓          | X    | X           | ✓        | Medium                 |
| 6      | ✓    | X       | X          | X    | X           | ✓        | Medium                 |
| 7      | ✓    | X       | X          | X    | X           | X        | Low                    |

The measured fluorescence intensity was found to increase in the following order: #2,7 < 5,6 < 1,3,4. Without EvaGreen, the PLGA layer did not generate a meaningful level of fluorescence (tests #2 and 7). A strong increase in non-specific fluorescence occurred only in the presence of both polymerase and primers. We hypothesize that the non-specific fluorescence during the early stage thermal incubation may be caused by preferential residence of EvaGreen in the PLGA layer with help from nucleic acids and polymerase, leading to a reduction in vibrational and rotational freedom of the intercalating dye, and thus an increase in its fluorescence, due to thermal shrinkage of PLGA.

**Movie S1:** Video showing burst release of fluorescein-labeled DNA encapsulated with PLGA upon heating at 60 °C (1 second movie time corresponds to 1 min real time). The concentration of PLGA/ethyl acetate solution used to form the PLGA layer was 8.0%.
